# Supplementary material
Source: publisher site journal article supplement (https://www.dovepress.com/article/499046)
Supplement: Supplementary file 1 [file get_supplementary_file.php]

**Supplemental material**

**Tables:**

**Table S1. Detection Methods for Bile Acids**

| **Category** | **Details** |
| --- | --- |
| **Serum Sample Preparation** | Take 150 μL of serum sample into a 1.5 mL centrifuge tube, add 10 μL of isotopically labeled internal standard working solution, and vortex for 30 seconds. Add 600 μL of methanol for protein precipitation, vortex for 5 minutes, and centrifuge at 12,500 r/min at 4°C for 10 minutes. Transfer 400 μL of the supernatant to a 1.5 mL centrifuge tube, evaporate to dryness under nitrogen at 60°C, and reconstitute with 50 μL of methanol-acetonitrile-water solution (4:4:2, v/v/v). Vortex for 3 minutes and centrifuge at 12,500 r/min at 4°C for 5 minutes. Transfer 40 μL of the supernatant into an autosampler vial, and inject 1 μL for bile acid profile analysis using liquid chromatography-tandem mass spectrometry (LC-MS/MS). |
| **Liquid Chromatography Conditions** | Bile acid subtypes were separated using an Acquity UPLC BEH C18 column (1.7 μm, 2.1 mm × 100 mm, Waters Corporation, USA). The mobile phase consisted of (A) 5 mmol/L ammonium bicarbonate aqueous solution and (B) methanol-acetonitrile (7:3, v/v). The gradient elution was programmed as follows: starting with 50% mobile phase B, increasing to 65% at 0.70 min, 85% at 4.20 min, then returning to 50% at 4.21 min and maintained until 5.20 min. The flow rate was 0.8 mL/min, the column temperature was 40°C, and the autosampler temperature was 10°C. |
| **Mass Spectrometry Conditions** | Electrospray ionization (ESI) in multiple reaction monitoring (MRM) mode with negative ion detection was used. The parameters were: curtain gas pressure, 10 psi; collision gas pressure, 9 psi; spray voltage, −4500 V; ion source temperature, 450°C; nebulizer gas pressure, 45 psi; auxiliary gas pressure, 45 psi; entrance potential, −10 V; and collision cell exit potential, −13 V. |

**Table S2. Optimization of mass spectrometry parameters of 15 bile acids and isotope internal standard**.

| ID | Q1 Mass (m/z) | Q3 Mass (m/z) | CE（V） |
| --- | --- | --- | --- |
| LCA | 375.1 | 375.1 | -10 |
| DCA+CDCA +UDCA | 391.1 | 391.1 | -10 |
| CA | 407.2 | 407.2 | -10 |
| GLCA | 432.4 | 74.0 | -40 |
| GLCA | 432.4 | 432.4 | -10 |
| GDCA+GCDCA +GUDCA | 448.4 | 448.4 | -10 |
| GCA | 464.1 | 464.1 | -10 |
| TLCA | 482.2 | 482.2 | -10 |
| TDCA+TCDCA+ TUDCA | 498.1 | 498.1 | -10 |
| TCA | 514.2 | 514.2 | -10 |
| CA-d4 | 411.2 | 411.2 | -10 |
| TLCA-d4 | 486.2 | 486.2 | -10 |
| TUDCA-d4 | 502.1 | 502.1 | -10 |

Abbreviations: LCA, lithocholic acid; DCA, deoxycholic acid; CDCA, chenodeoxycholic acid; UDCA, ursodeoxycholic acid; CA, cholic acid; GLCA, glycolithocholic acid; GDCA, glycodeoxycholic acid; GCDCA, glycochenodeoxycholic acid; GUDCA, glycoursodeoxycholic acid; GCA, glycocholic acid; TLCA, taurolithocholicacid; TDCA, taurodeoxycholic acid; TCDCA, taurochenodeoxycholic acid; TUDCA, tauroursodeoxycholic acid; TCA, taurocholic acid;

**Table S3. Detection Methods for Amino Acids**

| **Category** | **Details** |
| --- | --- |
| **Serum Sample Preparation** | Precisely pipette 10 μL of human plasma and add 10 μL of internal standard working solution. Vortex at 2000 rpm for 1 minute, then add 600 μL of methanol and vortex again at 2000 rpm for 3 minutes. Centrifuge at 15,000 g at 4°C for 5 minutes. Take 20 μL of the supernatant, add 15 μL of dansyl chloride and 15 μL of sodium carbonate-sodium bicarbonate buffer, vortex at 2000 rpm for 1 minute, and incubate at 60°C for 20 minutes. After incubation, add 100 μL of water, vortex for 30 seconds at 2000 rpm, and let stand at 4°C for 10 minutes. Centrifuge again at 15,000 g at 4°C for 5 minutes, then take 100 μL of the supernatant for measurement. |
| **Liquid Chromatography Conditions** | Amino acids were separated using a Waters Xselect HSS T3 column (2.5 μm, 2.1 × 100 mm) equipped with an in-line filter. The mobile phases consisted of (A) 0.1% formic acid in water and (B) 0.1% formic acid in acetonitrile. Gradient elution was performed at a column temperature of 40°C and an autosampler temperature of 10°C, with a flow rate of 0.8 mL/min. The injection volume was 1 μL. The needle was washed with a methanol-water solution (75:25, v/v) after each injection. |
| **Mass Spectrometry Conditions** | Mass spectrometric analysis was performed using a positive electrospray ionization (ESI+) source in multiple reaction monitoring (MRM) mode. The parameters were as follows: Curtain Gas (CUR), 35 psi; Collision Gas (CAD), 7 psi; Ion Spray Voltage (IS), 5500 V; Temperature (TEM), 550°C; Declustering Potential (DP), 60 V; Entrance Potential (EP), 10 V; Collision Cell Exit Potential (CXP), 8 V; Gas 1, 55 psi; Gas 2, 55 psi. |

**Table S4. Mobile Phase Gradient Conditions for 19 Amino Acids**

| Time（min） | Flow(mL/min) | A Conc | B Conc | B Curve |
| --- | --- | --- | --- | --- |
| 0.00 | 0.35 | 85 | 15 | 0 |
| 2.00 | 0.35 | 85 | 15 | 0 |
| 10.50 | 0.35 | 40 | 60 | 0 |
| 11.50 | 0.35 | 5 | 95 | 0 |
| 13.00 | 0.35 | 0 | 100 | 0 |
| 13.01 | 0.35 | 85 | 15 | 0 |
| 15.00 | 0.35 | 85 | 15 | 0 |

**Table S5. Optimization of Mass Spectrometry Parameters for 19 Amino Acids and Isotopically Labeled Internal Standards**

| ID | Q1 Mass (m/z) | Q3 Mass (m/z) | CE(V) |
| --- | --- | --- | --- |
| Ala | 323.110 | 170.1 | 30 |
| Asn | 366.110 | 170.1 | 30 |
| Asp | 367.100 | 170.1 | 35 |
| Glu | 381.110 | 170.1 | 30 |
| Gly | 309.090 | 170.1 | 30 |
| His | 622.180 | 170.1 | 45 |
| Ile | 365.150 | 170.1 | 30 |
| Leu | 365.150 | 170.1 | 30 |
| Lys | 307.100 | 170.1 | 25 |
| Met | 383.110 | 170.1 | 30 |
| Phe | 399.140 | 170.1 | 35 |
| Ser | 339.100 | 170.1 | 35 |
| Thr | 353.120 | 170.1 | 30 |
| Trp | 438.150 | 170.1 | 30 |
| Val | 351.140 | 170.1 | 30 |
| Tyr | 648.200 | 170.1 | 46 |
| Arg | 408.200 | 170.1 | 46 |
| Gln | 380.130 | 170.1 | 19 |
| Pro | 349.120 | 170.1 | 20 |
| Met-d3 | 386.110 | 170.1 | 30 |
| Tyr-d4 | 652.200 | 170.1 | 46 |
| Trp-d5 | 443.150 | 170.1 | 30 |
| Gly-d5 | 313.090 | 170.1 | 30 |
| Asp-d3 | 370.100 | 170.1 | 35 |
| Leu-d3 | 368.150 | 170.1 | 30 |
| His-d3 | 625.180 | 170.1 | 45 |
| Ala-d4 | 327.110 | 170.1 | 30 |
| Arg-13C6 | 414.200 | 170.1 | 46 |
| Gln-13C | 381.130 | 170.1 | 19 |
| Pro-d3 | 352.120 | 170.1 | 20 |
| Ser-d3 | 342.100 | 170.1 | 35 |
| Thr-15N | 354.120 | 170.1 | 30 |
| Glu-d3 | 384.110 | 170.1 | 30 |

Abbreviations: Ala, alanine; Asn, asparagine; Asp, aspartic acid; Glu, glutamic acid; Gly, glycine; His, histidine; Ile, isoleucine; Leu, leucine; Lys, lysine; Met, methionine; Phe, phenylalanine; Ser, serine; Thr, threonine; Trp, tryptophan; Val, valine; Tyr, tyrosine; Gln, glutamine; Pro, proline; Arg, arginine;

**Table S6- Differences of BAs and AAs profiles in 3 groups in the training cohort**

| **Concentration** | NCAD | UA | AMI | p. value 1* | p.value2* | p. value3* | p. value4* |
| --- | --- | --- | --- | --- | --- | --- | --- |
| (n=72) | (n=115) | (n=55) | (3 groups) | (NCAD vs UA) | (NCAD vs AMI) | (UA vs AMI) |
| LCA | 0.0203(0.0133,0.0323) | 0.0234(0.0160,0.0403) | 0.0193(0.0149,0.0303) | 0.149 | 0.081 | 0.763 | 0.155 |
| DCA | 0.3372(0.1327,0.7303) | 0.5219(0.2074,0.8682) | 0.3118(0.1121,0.5430) | 0.003* | 0.045* | 0.229 | 0.001* |
| CDCA | 0.3031(0.1394,1.0605) | 0.3733(0.1278,1.1913) | 0.2539(0.0858,0.5409) | 0.070 | 0.579 | 0.083 | 0.026* |
| UDCA | 0.0996(0.0302,0.1562) | 0.0639(0.0310,0.1576) | 0.0479(0.0272,0.0924) | 0.019* | 0.471 | 0.006* | 0.025* |
| CA | 0.0667(0.0519,0.2652) | 0.0728(0.0667,0.4284) | 0.0667(0.0462,0.1349) | 0.123 | 0.256 | 0.360 | 0.048* |
| GLCA | 0.0086(0.0059,0.0120) | 0.0098(0.0076,0.0141) | 0.0095(0.0071,0.0137) | 0.125 | 0.045* | 0.211 | 0.574 |
| GDCA | 0.1907(0.0728,0.4055) | 0.1890(0.0986,0.3885) | 0.1572(0.0667,0.2501) | 0.142 | 0.648 | 0.176 | 0.047* |
| GCDCA | 0.9325(0.4550,1.8176) | 0.6947(0.3434,1.3974) | 0.5722(0.3164,0.9731) | 0.011* | 0.058 | 0.003* | 0.137 |
| GUDCA | 0.1257(0.0685,0.3138) | 0.0857(0.0443,0.1959) | 0.0697(0.0409,0.1515) | 0.005* | 0.019* | 0.002* | 0.183 |
| GCA | 0.1762(0.1045,0.3496) | 0.1642(0.0810,0.3399) | 0.1540(0.0575,0.2752) | 0.235 | 0.377 | 0.114 | 0.236 |
| TLCA | 0.0065(0.0042,0.0078) | 0.0067(0.0046,0.0078) | 0.0063(0.0032,0.0067) | 0.050 | 0.387 | 0.138 | 0.014* |
| TDCA | 0.0143(0.0072,0.0309) | 0.0157(0.0083,0.0300) | 0.0089(0.0044,0.0225) | 0.024* | 0.622 | 0.051 | 0.006* |
| TCDCA | 0.0595(0.0376,0.1605) | 0.0486(0.0284,0.1052) | 0.0543(0.0261,0.0925) | 0.026* | 0.027* | 0.013* | 0.558 |
| TUDCA | 0.0069(0.0035,0.0129) | 0.0051(0.0031,0.0094) | 0.0049(0.0033,0.0067) | 0.118 | 0.083 | 0.056 | 0.830 |
| TCA | 0.0185(0.0075,0.0515) | 0.0153(0.0066,0.0403) | 0.0143(0.0053,0.0349) | 0.333 | 0.401 | 0.139 | 0.401 |
| Ala | 527.15(438.40,623.40) | 527.90(426.60,611.90) | 508.20(434.95,597.25) | 0.886 | 0.789 | 0.609 | 0.604 |
| Asn | 50.90(44.98,59.70) | 52.90(47.20,60.30) | 50.50(43.05,60.10) | 0.338 | 0.249 | 0.637 | 0.212 |
| Asp | 32.41(26.70,46.91) | 32.50(25.10,41.00) | 36.60(28.90,49.65) | 0.164 | 0.549 | 0.231 | 0.055 |
| Glu | 108.65(85.66,137.55) | 140.80(114.10,171.80) | 138.60(107.85,178.10) | <0.001* | <0.001* | <0.001* | 0.818 |
| Gly | 245.40(206.72,312.00) | 239.90(198.70,326.90) | 203,70(187.10,298.75) | 0.115 | 0.675 | 0.040* | 0.096 |
| His | 91.15(78.11,106.10) | 96.50(82.90,110.50) | 87.40(69.75,96.55) | 0.006* | 0.092 | 0.110 | 0.002* |
| Ile | 74.46(62,75,90.20) | 75.00(61.00,87.80) | 73.50(65.95,92.40) | 0.616 | 0.534 | 0.632 | 0.373 |
| Leu | 146.20(130.60,169.80) | 146.00(128.10,166.10) | 147.20(130.95,176.05) | 0.574 | 0.535 | 0.663 | 0.313 |
| Lys | 208.15(178.50,247.30) | 206.60(180.10,239.60) | 184.20(154.80,208.50) | 0.006* | 0.567 | 0.003* | 0.005* |
| Met | 32.39(28.39,37.30) | 34.50(29.20,41.90) | 31.90(25.70,36.30) | 0.086 | 0.206 | 0.335 | 0.018* |
| Phe | 100.30(88.75,123.86) | 97.70(88.10,113.90) | 110.20(100.20,125.35) | 0.009* | 0.177 | 0.112 | 0.002* |
| Ser | 106.69(53.15,162.91) | 92.70(58.10,140.30) | 106.90(76.80,168.10) | 0.211 | 0.328 | 0.556 | 0.076 |
| Thr | 143.26(125.61,168.07) | 157.90(132.00,181.90) | 139.80(117.20,169.35) | 0.017* | 0.049* | 0.382 | 0.009* |
| Trp | 61.95(55.50,75.55) | 61.10(52.70,69.70) | 56.80(48.50,65.05) | 0.008* | 0.179 | 0.003* | 0.023* |
| Val | 281.28(243.43,310.09) | 276.80(238.70,302.90) | 266.80(234.20,311.50) | 0.763 | 0.568 | 0.491 | 0.817 |
| Tyr | 81.30(64.60,94.30) | 72.00(56.80,87.00) | 73.50(60.90,90.75) | 0.147 | 0.051 | 0.432 | 0.368 |
| Gln | 595.65(497.40,708.65) | 520.00(454.00,606.20) | 545.90(456.60,673.85) | 0.004* | <0.001* | 0.160 | 0.171 |
| Pro | 178.80(158.67,219.96) | 222.10(175.60,281.10) | 196.70(163.25,250.90) | 0.003* | <0.001* | 0.204 | 0.097 |
| Arg | 173.10(141.28,206.80) | 168.40(141.40,202.80) | 178.30(153.00,208.65) | 0.525 | 0.649 | 0.703 | 0.406 |

**Notes:** All concentrations are expressed in μmol/L. The Kruskal-Wallis test (for three groups) or Mann-Whitney U test (for two groups) was applied to non-normally distributed variables (*P < 0.05 indicates statistical significance).

**Abbreviations:** NCAD, non-coronary artery disease; UA, unstable angina; AMI, acute myocardial infarction; LCA, lithocholic acid; DCA, deoxycholic acid; CDCA, chenodeoxycholic acid; UDCA, ursodeoxycholic acid; CA, cholic acid; GLCA, glycolithocholic acid; GDCA, glycodeoxycholic acid; GCDCA, glycochenodeoxycholic acid; GUDCA, glycoursodeoxycholic acid; GCA, glycocholic acid; TLCA, taurolithocholicacid; TDCA, taurodeoxycholic acid; TCDCA, taurochenodeoxycholic acid; TUDCA, tauroursodeoxycholic acid; TCA, taurocholic acid; Ala, alanine; Asn, asparagine; Asp, aspartic acid; Glu, glutamic acid; Gly, glycine; His, histidine; Ile, isoleucine; Leu, leucine; Lys, lysine; Met, methionine; Phe, phenylalanine; Ser, serine; Thr, threonine; Trp, tryptophan; Val, valine; Tyr, tyrosine; Gln, glutamine; Pro, proline; Arg, arginine.

**Table S7-** Differential BAs and AAs between UA and AMI group in the training cohort

| Metabolite | VIP | P value | p adj |
| --- | --- | --- | --- |
| LCA | 0.5798 | 0.155 | 0.277 |
| DCA | 1.2423 | 0.001* | 0.034 |
| CDCA | 1.1708 | 0.026* | 0.080 |
| UDCA | 1.1400 | 0.025* | 0.085 |
| CA | 1.1487 | 0.048* | 0.126 |
| GLCA | 0.4965 | 0.574 | 0.651 |
| GDCA | 1.1086 | 0.047* | 0.133 |
| GCDCA | 1.0757 | 0.137 | 0.259 |
| GUDCA | 0.7768 | 0.183 | 0.296 |
| GCA | 1.0215 | 0.236 | 0.349 |
| TLCA | 1.0114 | 0.014* | 0.068 |
| TDCA | 1.0390 | 0.006* | 0.041 |
| TCDCA | 1.0301 | 0.558 | 0.654 |
| TUDCA | 0.6401 | 0.830 | 0.830 |
| TCA | 0.5183 | 0.401 | 0.505 |
| Ala | 0.7938 | 0.604 | 0.662 |
| Asn | 0.9122 | 0.212 | 0.328 |
| Asp | 1.0319 | 0.055 | 0.134 |
| Glu | 0.5002 | 0.818 | 0.843 |
| Gly | 0.5478 | 0.096 | 0.204 |
| His | 1.3878 | 0.002* | 0.034 |
| Ile | 1.1571 | 0.373 | 0.488 |
| Leu | 1.1307 | 0.313 | 0.443 |
| Lys | 1.3976 | 0.005 | 0.043 |
| Met | 1.3340 | 0.018* | 0.077 |
| Phe | 1.4476 | 0.002* | 0.034 |
| Ser | 0.9465 | 0.076 | 0.172 |
| Thr | 1.1230 | 0.009* | 0.051 |
| Trp | 1.0030 | 0.023* | 0.087 |
| Val | 0.8354 | 0.817 | 0.868 |
| Tyr | 0.8840 | 0.368 | 0.500 |
| Gln | 1.0755 | 0.171 | 0.291 |
| Pro | 0.6419 | 0.097 | 0.194 |
| Arg | 0.5913 | 0.406 | 0.493 |
| **Abbreviations:** NCAD, non-coronary artery disease; UA, unstable angina; AMI, acute myocardial infarction; VIP, variable influence on projection; P adj, adjusted by the False Discovery Rate method; LCA, lithocholic acid; DCA, deoxycholic acid; CDCA, chenodeoxycholic acid; UDCA, ursodeoxycholic acid; CA, cholic acid; GLCA, glycolithocholic acid; GDCA, glycodeoxycholic acid; GCDCA, glycochenodeoxycholic acid; GUDCA, glycoursodeoxycholic acid; GCA, glycocholic acid; TLCA, taurolithocholicacid; TDCA, taurodeoxycholic acid; TCDCA, taurochenodeoxycholic acid; TUDCA, tauroursodeoxycholic acid; TCA, taurocholic acid; Ala, alanine; Asn, asparagine; Asp, aspartic acid; Glu, glutamic acid; Gly, glycine; His, histidine; Ile, isoleucine; Leu, leucine; Lys, lysine; Met, methionine; Phe, phenylalanine; Ser, serine; Thr, threonine; Trp, tryptophan; Val, valine; Tyr, tyrosine; Gln, glutamine; Pro, proline; Arg, arginine. | | | |

**Table S8- Association of metabolites with clinical indicators or metabolites with each other in three groups in the training cohort**

| **correlation** | **GLU** | **TG** | **TC** | **HDL-C** | **LDL-C** | **VLDL** | **ALT** | **AST** | **UA** | **UREA** | **CREA** | **CK** | **CK-MB** | **TBA** |
| --- | --- | --- | --- | --- | --- | --- | --- | --- | --- | --- | --- | --- | --- | --- |
| **LCA** | 0.0165 | 0.0176 | -0.0470 | 0.0309 | -0.0616 | 0.0180 | -0.0822 | -0.0383 | -0.0444 | -0.1114 | -0.0526 | -0.0601 | -0.0602 | 0.1218 |
| **DCA** | -0.0370 | 0.0817 | 0.0082 | -0.0515 | -0.0250 | 0.0654 | -0.0665 | -0.1128 | -0.1297 | -0.1450 | -0.0989 | -0.1051 | -0.0687 | 0.3544 |
| **CDCA** | 0.0057 | 0.1532 | 0.0889 | -0.0751 | 0.0552 | 0.1179 | 0.0730 | -0.0287 | -0.0057 | -0.0916 | 0.0032 | 0.0053 | 0.0519 | 0.4409 |
| **UDCA** | -0.0327 | 0.1522 | 0.1343 | 0.0016 | 0.0980 | 0.1302 | -0.0373 | -0.1144 | -0.0507 | -0.0791 | -0.0159 | 0.0156 | 0.0445 | 0.3426 |
| **CA** | 0.0155 | 0.1031 | 0.0058 | -0.0765 | -0.0338 | 0.0684 | -0.0249 | -0.0543 | -0.0563 | -0.0434 | 0.0396 | -0.0203 | 0.0764 | 0.3827 |
| **GLCA** | 0.0109 | 0.0386 | -0.0303 | -0.0449 | 0.0225 | 0.0461 | 0.0151 | -0.0085 | -0.0098 | -0.1128 | -0.0557 | -0.0398 | -0.0244 | 0.1393 |
| **GDCA** | -0.0341 | 0.0317 | 0.0958 | 0.0591 | 0.0620 | 0.0138 | -0.0780 | -0.0315 | -0.0988 | -0.0924 | -0.0937 | -0.1379 | -0.0880 | 0.3814 |
| **GCDCA** | 0.0245 | 0.0520 | 0.1220 | 0.0440 | 0.1066 | 0.0359 | 0.0416 | 0.0831 | -0.0126 | 0.0237 | -0.0324 | -0.0711 | -0.0132 | 0.4873 |
| **GUDCA** | -0.0840 | 0.0515 | 0.1733 | 0.1221 | 0.1359 | 0.0184 | -0.0249 | 0.0093 | -0.0312 | 0.0477 | -0.0609 | -0.0414 | 0.0125 | 0.3384 |
| **GCA** | 0.0899 | 0.0945 | 0.1470 | 0.0817 | 0.0971 | 0.0887 | 0.0352 | 0.0628 | -0.0333 | 0.0230 | -0.0680 | -0.0552 | -0.0284 | 0.4564 |
| **TLCA** | 0.1165 | -0.0037 | 0.0218 | 0.1016 | -0.0240 | -0.0282 | -0.1244 | -0.1144 | -0.1133 | 0.0073 | -0.0417 | -0.0714 | -0.1230 | 0.0813 |
| **TDCA** | 0.0458 | 0.0344 | 0.0553 | 0.0701 | 0.0261 | 0.0198 | -0.0623 | -0.0284 | -0.0527 | -0.0048 | -0.0871 | -0.1518 | -0.1052 | 0.2638 |
| **TCDCA** | 0.1191 | 0.0223 | 0.0862 | 0.0367 | 0.0748 | 0.0135 | 0.0054 | 0.1084 | 0.0925 | 0.1170 | 0.0174 | -0.0729 | -0.0291 | 0.4054 |
| **TUDCA** | 0.0877 | 0.0511 | 0.0558 | 0.0566 | 0.0237 | 0.0454 | -0.0375 | 0.0285 | 0.0887 | 0.0684 | 0.0050 | -0.0715 | 0.0009 | 0.2509 |
| **TCA** | 0.1498 | 0.1319 | 0.1139 | 0.0159 | 0.0745 | 0.1237 | 0.0437 | 0.0850 | 0.0458 | -0.0349 | -0.0556 | -0.0773 | -0.1021 | 0.3183 |
| **Ala** | 0.2222 | 0.4038 | 0.0825 | -0.2000 | 0.0054 | 0.4385 | 0.1780 | 0.0663 | 0.1364 | -0.0785 | 0.0794 | 0.0641 | -0.0174 | 0.0769 |
| **Asn** | -0.0926 | -0.0914 | -0.0624 | 0.0051 | -0.0394 | -0.0530 | -0.0584 | -0.1314 | -0.0018 | 0.1306 | 0.2205 | -0.0509 | -0.1260 | -0.0787 |
| **Asp** | 0.1277 | -0.0031 | -0.0262 | -0.0328 | -0.0483 | 0.0160 | 0.0203 | 0.0779 | -0.0767 | -0.0238 | -0.0395 | 0.0297 | -0.0406 | 0.1181 |
| **Glu** | 0.1892 | 0.2361 | -0.0285 | -0.2293 | -0.0669 | 0.2961 | 0.2775 | 0.1954 | 0.2172 | 0.0718 | 0.0927 | 0.1506 | -0.0516 | -0.0836 |
| **Gly** | -0.1341 | -0.2008 | -0.0186 | 0.1520 | -0.0184 | -0.1507 | -0.1010 | -0.2115 | -0.1500 | -0.0924 | -0.0735 | -0.1231 | -0.1472 | 0.0029 |
| **His** | -0.0639 | 0.0162 | 0.0466 | -0.1080 | 0.0523 | 0.0749 | -0.0049 | -0.1453 | 0.1255 | 0.1038 | 0.1790 | 0.0092 | -0.0765 | -0.0944 |
| **Ile** | 0.1429 | 0.2359 | 0.0278 | -0.3041 | -0.0180 | 0.3087 | 0.2389 | 0.1589 | 0.2319 | 0.1487 | 0.2058 | 0.0181 | 0.0175 | 0.1292 |
| **Leu** | 0.1470 | 0.2516 | 0.0531 | -0.2907 | 0.0140 | 0.3256 | 0.2489 | 0.1389 | 0.2627 | 0.1070 | 0.1951 | 0.0516 | -0.0287 | 0.0380 |
| **Lys** | 0.0502 | 0.1785 | -0.0147 | -0.1351 | -0.0722 | 0.2200 | 0.1700 | 0.0639 | 0.1575 | -0.0405 | 0.0301 | -0.0155 | -0.1055 | -0.0136 |
| **Met** | 0.0566 | 0.0562 | -0.0828 | -0.1332 | -0.0746 | 0.0957 | 0.1092 | -0.0186 | 0.1283 | 0.1228 | 0.2206 | 0.0097 | -0.0477 | -0.1116 |
| **Phe** | 0.1607 | 0.1913 | 0.0327 | -0.1928 | 0.0096 | 0.2570 | 0.2169 | 0.2156 | 0.0219 | 0.0320 | 0.0737 | 0.1006 | -0.0052 | 0.0199 |
| **Ser** | 0.0153 | -0.1088 | -0.0066 | 0.0489 | -0.0074 | -0.0677 | 0.0988 | 0.1348 | -0.1533 | -0.0961 | -0.1207 | 0.0643 | 0.0015 | 0.0467 |
| **Thr** | -0.0283 | -0.0746 | -0.1531 | -0.0068 | -0.1534 | -0.0574 | 0.0222 | -0.0125 | 0.0276 | 0.0550 | 0.1745 | -0.0673 | -0.1111 | 0.1001 |
| **Trp** | 0.1290 | 0.3040 | 0.0584 | -0.1507 | 0.0059 | 0.3490 | 0.2441 | 0.0829 | 0.1410 | -0.0806 | 0.1221 | 0.1383 | -0.0464 | -0.0167 |
| **Val** | 0.1619 | 0.2676 | 0.0772 | -0.2928 | 0.0391 | 0.3307 | 0.2485 | 0.1417 | 0.2226 | 0.0782 | 0.1614 | 0.0493 | -0.0145 | 0.0893 |
| **Tyr** | 0.0896 | 0.1174 | 0.0313 | -0.0630 | 0.0068 | 0.1525 | 0.1719 | 0.1765 | -0.0190 | -0.0907 | -0.0214 | 0.1706 | 0.0203 | 0.0473 |
| **Gln** | -0.0402 | -0.1063 | -0.0385 | 0.0318 | -0.0258 | -0.0997 | -0.0712 | -0.0283 | -0.1386 | -0.0630 | 0.0220 | -0.0792 | 0.0040 | 0.2479 |
| **Pro** | 0.1364 | 0.2391 | -0.1288 | -0.3104 | -0.1492 | 0.2455 | 0.0406 | -0.0311 | 0.2374 | 0.1274 | 0.2722 | 0.0053 | -0.0185 | 0.1063 |
| **Arg** | 0.1106 | 0.1331 | 0.0917 | -0.0611 | 0.0768 | 0.1655 | 0.1091 | 0.0506 | 0.0903 | -0.0322 | 0.0409 | -0.0102 | -0.1421 | 0.0738 |
| **Abbreviations:** NCAD, non-coronary artery disease ; UA, unstable angina; AMI, acute myocardial infarction; LCA, lithocholic acid; DCA, deoxycholic acid; CDCA, chenodeoxycholic acid; UDCA, ursodeoxycholic acid; CA, cholic acid; GLCA, glycolithocholic acid; GDCA, glycodeoxycholic acid; GCDCA, glycochenodeoxycholic acid; GUDCA, glycoursodeoxycholic acid; GCA, glycocholic acid; TLCA, taurolithocholicacid; TDCA, taurodeoxycholic acid; TCDCA, taurochenodeoxycholic acid; TUDCA, tauroursodeoxycholic acid; TCA, taurocholic acid; Ala, alanine; Asn, asparagine; Asp, aspartic acid; Glu, glutamic acid; Gly, glycine; His, histidine; Ile, isoleucine; Leu, leucine; Lys, lysine; Met, methionine; Phe, phenylalanine; Ser, serine; Thr, threonine; Trp, tryptophan; Val, valine; Tyr, tyrosine; Gln, glutamine; Pro, proline; Arg, arginine; GLU, glucose; TC, total cholesterol; TG, triglyceride; HDL-C, high-density lipoprotein cholesterol; LDL-C, low-density lipoprotein cholesterol; VLDL, very low-density lipoprotein; UA, uric acid; CREA, creatinine; TBA, total bile acids; ALT, alanine aminotransferase; AST, aspartate aminotransferase; CK, creatine kinase; CK-MB, creatine kinase-MB. | | | | | | | | | | | | | | |

**Table S9- Differences of BAs and AAs profiles in 3 groups in the validation cohort**

| **Concentration** | UA | AMI | P value |
| --- | --- | --- | --- |
| (n=44) | (n=24) | (UA vs AMI) |
| LCA | 0.0263(0.0165,0.0460) | 0.0171(0.0133,0.0256) | 0.005* |
| DCA | 0.4404(0.1820,1.0059) | 0.2029(0.0989,0.3188) | 0.015* |
| CDCA | 0.4729(0.1482,1.1555) | 0.2142(0.1278,0.4536) | 0.130 |
| UDCA | 0.0708(0.0358,0.1794) | 0.0373(0.0190,0.0756) | 0.022* |
| CA | 0.0780(0.0657,0.3837) | 0.0667(0.0459,0.1682) | 0.200 |
| GLCA | 0.0109(0.0080,0.0171) | 0.0078(0.0053,0.0120) | 0..030* |
| GDCA | 0.2174(0.0889,0.5033) | 0.1435(0.0667,0.3357) | 0.259 |
| GCDCA | 0.8172(0.4623,1.5246) | 0.5774(0.3528,1.1734) | 0.411 |
| GUDCA | 0.1201(0.0620,0.2227) | 0.0705(0.0357,0.1982) | 0.178 |
| GCA | 0.2546(0.0877,0.3894) | 0.1677(0.0659,0.2778) | 0.336 |
| TLCA | 0.0067(0.0042,0.0080) | 0.0067(0.0051,0.0079) | 0.488 |
| TDCA | 0.0171(0.0068,0.0358) | 0.0155(0.0069,0.0292) | 0.715 |
| TCDCA | 0.0625(0.0196,0.1361) | 0.0743(0.0291,0.1207) | 0.538 |
| TUDCA | 0.0046(0.0022,0.0087) | 0.0040(0.0022,0.0111) | 0.898 |
| TCA | 0.0188(0.0060,0.0413) | 569.17±147.97 | 0.656 |
| Ala | 552.39±147.59 | 548.35(455.05,657.70) | 0.608 |
| Asn | 53.35±10.95 | 54.89±12.49 | 0.599 |
| Asp | 37.68±13.69 | 37.21±15.30 | 0.899 |
| Glu | 139.45(116.10,172.90) | 131.30(106.05,156.55) | 0.496 |
| Gly | 267.10(216.80,349.90) | 218.60(171.70,304.25) | 0.043* |
| His | 96.72±16.72 | 86.51±19.47 | 0.027* |
| Ile | 73.54±14.80 | 88.95±22.01 | 0.001 |
| Leu | 142.15(128.60,159.25) | 153.50(135.40,180.10) | 0.097 |
| Lys | 220.55(196.00,236.15) | 205.55(182.70,240.50) | 0.472 |
| Met | 34.05(27.90,40.85) | 33.75(23.85,40.05) | 0.349 |
| Phe | 104.74±22.82 | 114.05±31.82 | 0.168 |
| Ser | 93.55(54.75,134.20) | 124.20(73.40,171.80) | 0.211 |
| Thr | 155.44±33.63 | 158.26±45.02 | 0.770 |
| Trp | 60.35(53.90,71.30) | 55.55(50.35,68.70） | 0.339 |
| Val | 268.40±43.12 | 292.11±50.15 | 0.045 |
| Tyr | 77.80(60.65,92.10) | 76.15(58.60,95.05) | 0.949 |
| Gln | 536.70±110.68 | 610.24±200.18 | 0.106 |
| Pro | 225.27±69.58 | 242.29±66.51 | 0.331 |
| Arg | 176.00±49.66 | 190.93±62.29 | 0.282 |

**Notes:** Values are expressed as mean ± SD or median (IQR). All concentrations are expressed in μmol/L. The t-test was used for comparisons of normally distributed continuous variables, while the Mann-Whitney U test (for two groups) was applied to non-normally distributed variables (*P < 0.05 indicates statistical significance).

**Abbreviations:** UA, unstable angina; AMI, acute myocardial infarction; LCA, lithocholic acid; DCA, deoxycholic acid; CDCA, chenodeoxycholic acid; UDCA, ursodeoxycholic acid; CA, cholic acid; GLCA, glycolithocholic acid; GDCA, glycodeoxycholic acid; GCDCA, glycochenodeoxycholic acid; GUDCA, glycoursodeoxycholic acid; GCA, glycocholic acid; TLCA, taurolithocholicacid; TDCA, taurodeoxycholic acid; TCDCA, taurochenodeoxycholic acid; TUDCA, tauroursodeoxycholic acid; TCA, taurocholic acid; Ala, alanine; Asn, asparagine; Asp, aspartic acid; Glu, glutamic acid; Gly, glycine; His, histidine; Ile, isoleucine; Leu, leucine; Lys, lysine; Met, methionine; Phe, phenylalanine; Ser, serine; Thr, threonine; Trp, tryptophan; Val, valine; Tyr, tyrosine; Gln, glutamine; Pro, proline; Arg, arginine.

**Figures:**


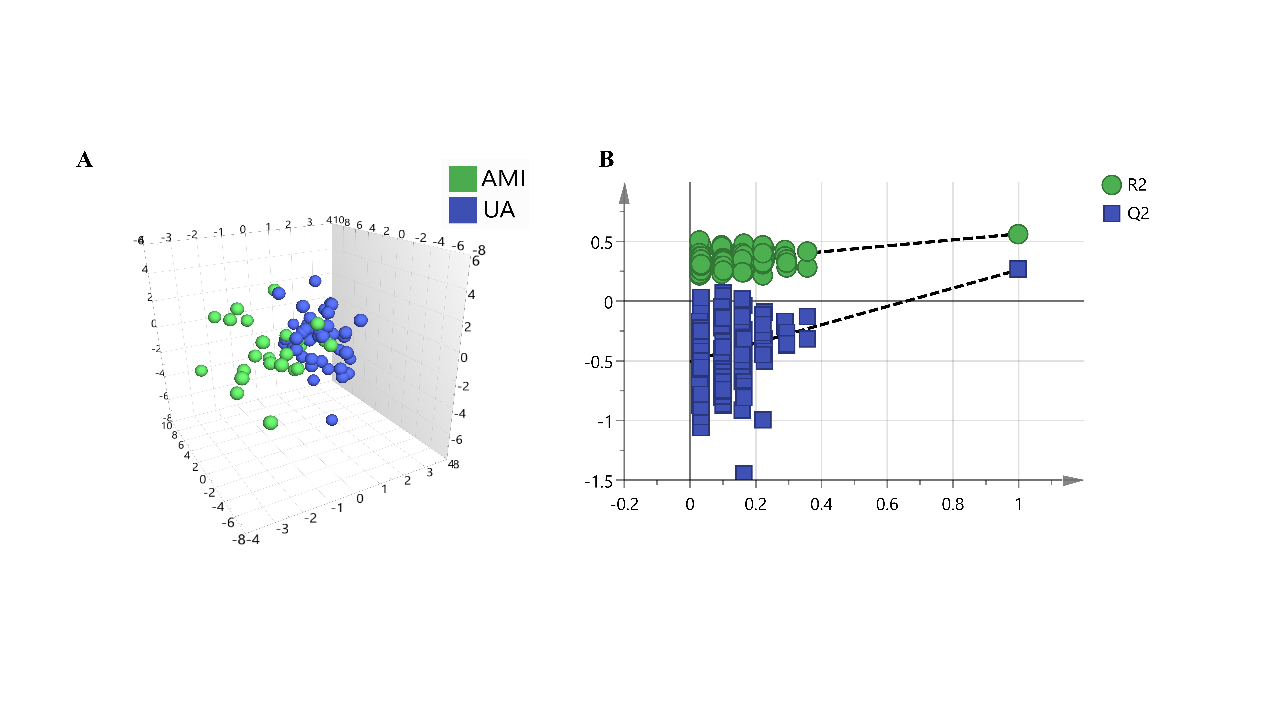
**Fig. S1:** Validation cohort. Metabolomic profiling by targeted metabolomics. **A.** OPLS−DA 3D models between UA and AMI groups. R2X = 0.328, R2Y = 0.564, and Q2Y = 0.263. **B**. The 200−permutation test demonstrated no overfitting in the OPLS-DA model [Q2 = (0.0, -0.502)].


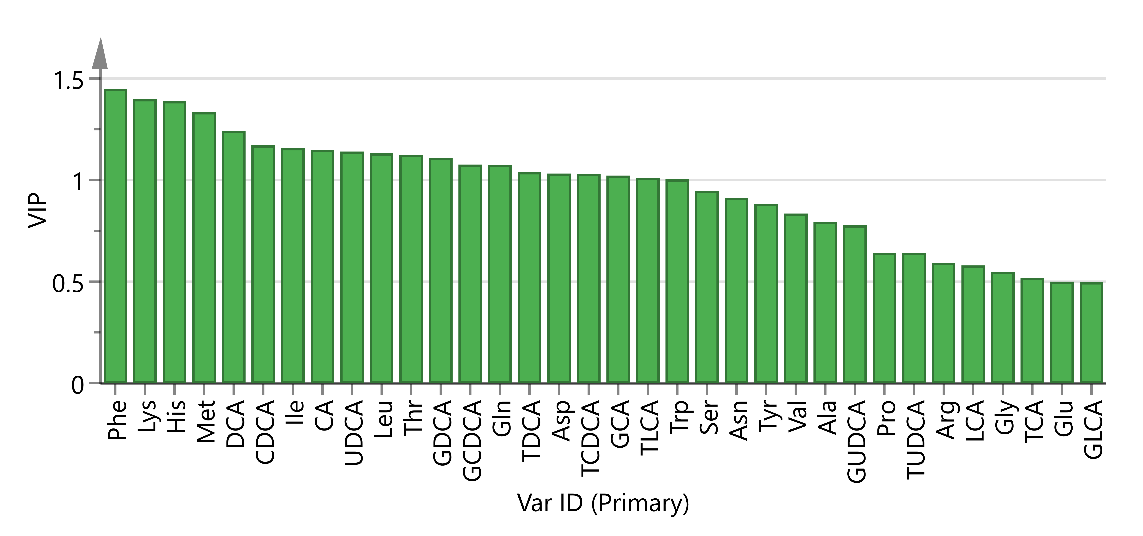


**Fig. S2:** Variable influence on projection (VIP) value of Orthogonal partial least squares-discriminant analysis (OPLS-DA) in the training cohort.


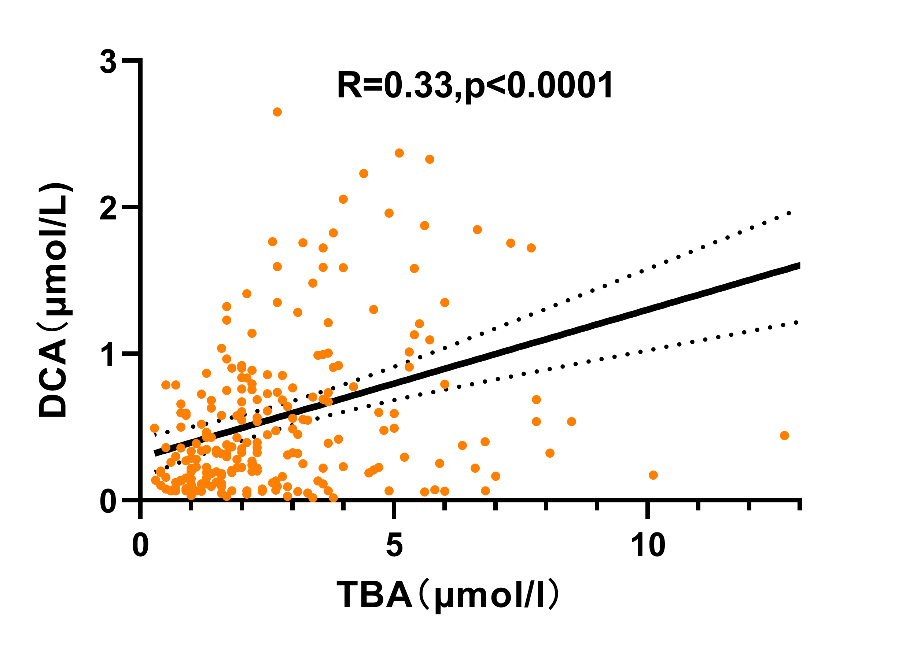


**Fig. S3:** The correlation between DCA and TBA.

**
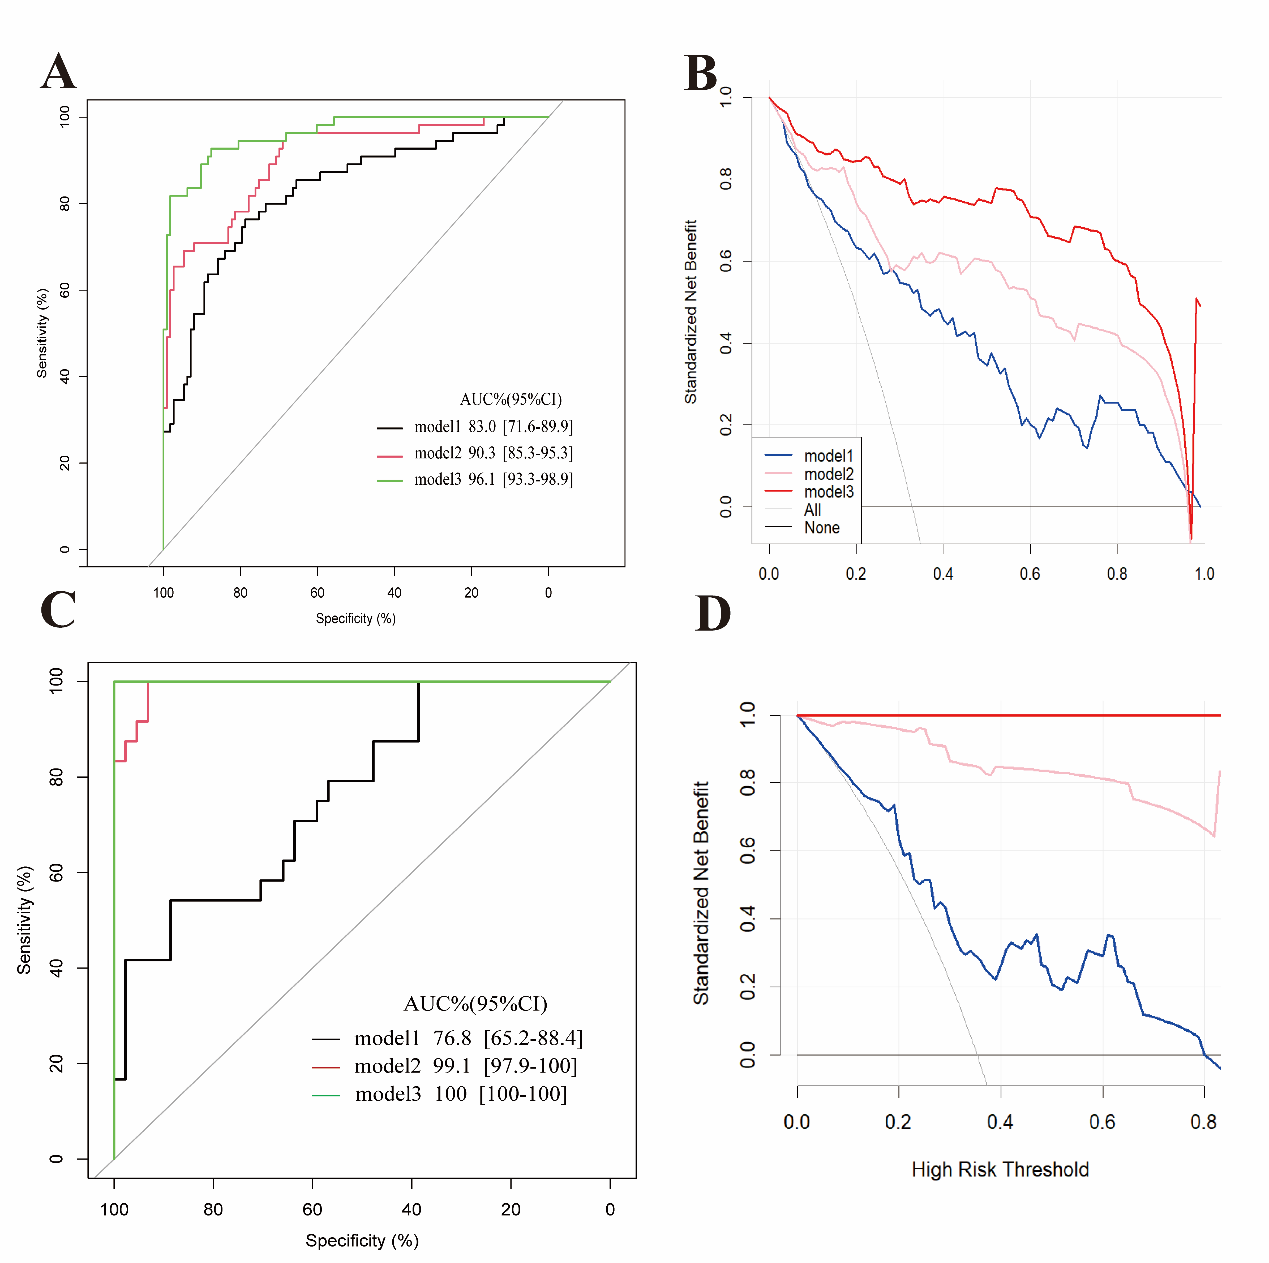
**

**Fig. S4:** Comparison of three model assessments of the 95% CI of their AUC values and comparison of model performance from Decision Curve analysis. **A, B:** exploration cohort; **C, D:** validation cohort. Model 1, biomarker metabolites; model 2, clinical factors; model 3, biomarker metabolites plus clinical factors.

**Note: B, D:** The study's x-axis represents the threshold probability of AMI risk, while the y-axis shows the net benefit at each threshold. The model curve's distance from the "none" and "all" lines—representing no treatment and treating all cases, respectively—indicates the net benefit, with greater distance signifying a higher return.
